# Supplementary material for: Investigating the Physico-Chemical Properties of Drinking Water Sources in Raya Kobo Woreda, North Wollo Zone, Ethiopia
Source: Research Square preprint supplement (doi:10.21203/rs.3.rs-7982487/v1), 2025-11-19
Supplement: Supplementary file 1 [file e24440ed2ab72ae64ccce226.docx]

# Determination of Physico-Chemical Parameters in Drinking Ground Water around in Raya Kobo North Wollo, Ethiopia

# Seyoum Endale Mekonen a, Ashenafi Zeleke Melaku a*

# aDepartment of Chemistry, College of Natural and computational Sciences, Woldia University, Woldia, North Wollo Zone, Amhara, Ethiopia

# *corresponding author

# Supplementary information

## **Calibration of the instruments in the Determination of selected metals**

Atomic Absorption Spectrophotometer (Model ZEENIT 700P) was used to determine the metal concentrations in the water sample. Instrument calibration was done using the standards before determination of the sample. The stock solution, that is 1000 ppm of each metal, was taken and 20 ppm was prepared as an intermediate for preparing the working standards. The working standards were prepared according to the sensitivity of each lamp in the AAS instrument. By using the working standards the instrument was calibrated with good correlation coefficient. After making sure the instrument was properly calibrated, the concentration of the metals in each sample was measured. The calibration curve exhibited good linearity, with R2 values ranging between 0.995 and 0.999 which were greater than the acceptable limit of 0.995 for the linearity. Based on the information from the correlation coefficients and their corresponding calibration curves for each metal, it is possible to say the two variables (concentration and absorbance) have a good positive correlation and linearity. The concentration of the working standards, correlation coefficient, and calibration equation of the calibration curve for each metal are shown in Table 3 of the Supplementary Material and figures 4-9.

Table S1: Working standard solution concentration, Calibration curve Regression equation and correlation coefficient for each metal analyzed.

| Metal | Concentration standard (mg/L) | Regression equation | Regression coefficient limit (R2 ) |
| --- | --- | --- | --- |
| Fe | 0.5, 1, 2, 4 | Y=0.1439x+0.0257 | 0.9955 |
| Pd | 0.25. 0.5, 1, 2 | Y=0.0193x+0.0005 | 0.9999 |
| Cd | 0.2 , 0.4, 0.6 ,0.8 | Y=0.0004x+2E-06 | 0.9968 |
| Cu | 0.15 0.25 0.45,0.65 | Y=0.1324x+0.0112 | 0.9999 |
| K+ | 0.5 1, 2 ,4 | Y=0.3562x+0.1616 | 0.9977 |
| Ca2+ | 5, 10, 15, 20 | Y=0.5258x+0.02154 | 0.9999 |
| Na+ | 0.5, 1, 2, 4 | Y=0.33233x+0.0921 | 0.9998 |

## **Method Detection Limits (MDL) and Limit of Quantification (LOQ)**

The Limit of Quantification (LOQ) and Method Detection Limits (MDL) for all the metals considered in this study have been calculated from the response of six replicates of the calibration reagent blank using a standard formula LOQ = 3 × SDb and MDL = 10×SD and the data are presented in table 4.The instrumental detection limits (IDL) as obtained from the instrument’s operation manual ranged from 0.001 to 0.03 mg/L. The Method Quantification Limit (MQL) value lay for the water sample in between 0.2 and 5.397 mg/L. The result shows both the MDL and MQL values were greater than that of the IDL hence; the results of the analysis could be reliable.

Table S2: Method Detection Limits (MDL) and Limit of Quantification (LOQ)

| Metal | SDb | IDL | LOD | LOQ |
| --- | --- | --- | --- | --- |
| Fe | 0.0158 | 0.0031 | 0.0474 | 0.5 |
| Pd | 0.0089 | 0.001 | 0.03 | 0.3 |
| Cd | 0.0084 | 0.001 | 0.025 | 0.25 |
| Cu | 0.0078 | 0.0032 | 0.02 | 0.2 |
| K | 0.0157 | 0.0012 | 0.05 | 0.5 |
| Na | 0.1799 | 0.021 | 0.5397 | 5.397 |
| Ca | 0.0093 | 0.03 | 0.0279 | 0.279 |

Table S3 Correlation of physico-chemical parameters in drinking ground water samples.

| parameters |  | Temp | TU | pH | EC | TDS | TSS | TH | Ca | K | Na | NO3-1 | PO4-2 |
| --- | --- | --- | --- | --- | --- | --- | --- | --- | --- | --- | --- | --- | --- |
| Temperature | Pearson Correlation | 1 | 0.394 | 0.144 | 0.943 | .951* | 0.577 | 0.13 | 0.788 | -.978* | -0.892 | -0.903 | -0.111 |
| Sig. (2-tailed) |  | 0.606 | 0.856 | 0.057 | 0.049 | 0.423 | 0.87 | 0.212 | 0.022 | 0.108 | 0.097 | 0.889 |
| N | 4 | 4 | 4 | 4 | 4 | 4 | 4 | 4 | 4 | 4 | 4 | 4 |
| TU | Pearson Correlation | 0.394 | 1 | -0.154 | 0.227 | 0.132 | -0.019 | 0.877 | 0.464 | -0.561 | -0.53 | 0.038 | 0.163 |
| Sig. (2-tailed) | 0.606 |  | 0.846 | 0.773 | 0.868 | 0.981 | 0.123 | 0.536 | 0.439 | 0.47 | 0.962 | 0.837 |
| N | 4 | 4 | 4 | 4 | 4 | 4 | 4 | 4 | 4 | 4 | 4 | 4 |
| pH | Pearson Correlation | 0.144 | -0.154 | 1 | 0.455 | 0.351 | -0.598 | 0.218 | 0.646 | -0.178 | -0.477 | -0.25 | -.999** |
| Sig. (2-tailed) | 0.856 | 0.846 |  | 0.545 | 0.649 | 0.402 | 0.782 | 0.354 | 0.822 | 0.523 | 0.75 | 0.001 |
| N | 4 | 4 | 4 | 4 | 4 | 4 | 4 | 4 | 4 | 4 | 4 | 4 |
| EC | Pearson Correlation | 0.943 | 0.227 | 0.455 | 1 | .985* | 0.359 | 0.106 | 0.891 | -0.917 | -0.93 | -0.925 | -0.424 |
| Sig. (2-tailed) | 0.057 | 0.773 | 0.545 |  | 0.015 | 0.641 | 0.894 | 0.109 | 0.083 | 0.07 | 0.075 | 0.576 |
| N | 4 | 4 | 4 | 4 | 4 | 4 | 4 | 4 | 4 | 4 | 4 | 4 |
| TDS | Pearson Correlation | .951* | 0.132 | 0.351 | .985* | 1 | 0.497 | -0.046 | 0.8 | -0.893 | -0.862 | -.976* | -0.319 |
| Sig. (2-tailed) | 0.049 | 0.868 | 0.649 | 0.015 |  | 0.503 | 0.954 | 0.2 | 0.107 | 0.138 | 0.024 | 0.681 |
| N | 4 | 4 | 4 | 4 | 4 | 4 | 4 | 4 | 4 | 4 | 4 | 4 |
| TTS | Pearson Correlation | 0.577 | -0.019 | -0.598 | 0.359 | 0.497 | 1 | -0.49 | -0.047 | -0.448 | -0.147 | -0.619 | 0.622 |
| Sig. (2-tailed) | 0.423 | 0.981 | 0.402 | 0.641 | 0.503 |  | 0.51 | 0.953 | 0.552 | 0.853 | 0.381 | 0.378 |
| N | 4 | 4 | 4 | 4 | 4 | 4 | 4 | 4 | 4 | 4 | 4 | 4 |
| TH | Pearson Correlation | 0.13 | 0.877 | 0.218 | 0.106 | -0.046 | -0.49 | 1 | 0.502 | -0.334 | -0.463 | 0.258 | -0.22 |
| Sig. (2-tailed) | 0.87 | 0.123 | 0.782 | 0.894 | 0.954 | 0.51 |  | 0.498 | 0.666 | 0.537 | 0.742 | 0.78 |
| N | 4 | 4 | 4 | 4 | 4 | 4 | 4 | 4 | 4 | 4 | 4 | 4 |
| Ca | Pearson Correlation | 0.788 | 0.464 | 0.646 | 0.891 | 0.8 | -0.047 | 0.502 | 1 | -0.852 | -.977* | -0.653 | -0.624 |
| Sig. (2-tailed) | 0.212 | 0.536 | 0.354 | 0.109 | 0.2 | 0.953 | 0.498 |  | 0.148 | 0.023 | 0.347 | 0.376 |
| N | 4 | 4 | 4 | 4 | 4 | 4 | 4 | 4 | 4 | 4 | 4 | 4 |
| K | Pearson Correlation | -.978* | -0.561 | -0.178 | -0.917 | -0.893 | -0.448 | -0.334 | -0.852 | 1 | 0.944 | 0.803 | 0.147 |
| Sig. (2-tailed) | 0.022 | 0.439 | 0.822 | 0.083 | 0.107 | 0.552 | 0.666 | 0.148 |  | 0.056 | 0.197 | 0.853 |
| N | 4 | 4 | 4 | 4 | 4 | 4 | 4 | 4 | 4 | 4 | 4 | 4 |
| Na | Pearson Correlation | -0.892 | -0.53 | -0.477 | -0.93 | -0.862 | -0.147 | -0.463 | -.977* | 0.944 | 1 | 0.73 | 0.451 |
| Sig. (2-tailed) | 0.108 | 0.47 | 0.523 | 0.07 | 0.138 | 0.853 | 0.537 | 0.023 | 0.056 |  | 0.27 | 0.549 |
| N | 4 | 4 | 4 | 4 | 4 | 4 | 4 | 4 | 4 | 4 | 4 | 4 |
| NO3- | Pearson Correlation | -0.903 | 0.038 | -0.25 | -0.925 | -.976* | -0.619 | 0.258 | -0.653 | 0.803 | 0.73 | 1 | 0.218 |
| Sig. (2-tailed) | 0.097 | 0.962 | 0.75 | 0.075 | 0.024 | 0.381 | 0.742 | 0.347 | 0.197 | 0.27 |  | 0.782 |
| N | 4 | 4 | 4 | 4 | 4 | 4 | 4 | 4 | 4 | 4 | 4 | 4 |
| PO42- | Pearson Correlation | -0.111 | 0.163 | -.999** | -0.424 | -0.319 | 0.622 | -0.22 | -0.624 | 0.147 | 0.451 | 0.218 | 1 |
| Sig. (2-tailed) | 0.889 | 0.837 | 0.001 | 0.576 | 0.681 | 0.378 | 0.78 | 0.376 | 0.853 | 0.549 | 0.782 |  |
| N | 4 | 4 | 4 | 4 | 4 | 4 | 4 | 4 | 4 | 4 | 4 | 4 |
| *. Correlation is significant at the 0.05 level (2-tailed). | | | | | | | | | | | | | |
| **. Correlation is significant at the 0.01 level (2-tailed). | | | | | | | | | | | | | |
